# Supplementary material for: From Euglycemia to Recent Onset of Type 2 Diabetes Mellitus: A Proof-of-Concept Study on Circulating microRNA Profiling Reveals Distinct, and Early microRNA Signatures
Source: MDPI journal article supplement (doi:10.3390/diagnostics13142443), 2023-07-21
Supplement: s1 [file s1]

## Supplementary Material

### From euglycemia to recent onset of Type 2 diabetes mellitus: circulating microRNA profiling reveals distinct, and early microRNA signatures

Marta Greco, Maria Mirabelli, Alessandro Salatino, Francesca Accattato, Vincenzo Aiello, Francesco S. Brunetti, Eusebio Chiefari, Salvatore A. Pullano, Antonino S. Fiorillo, Daniela P. Foti and Antonio Brunetti

**Table S1.** Highly expressed miRNAs ( $Ct \leq 25$ ) in euglycemic controls, and IFG and new-onset T2D patients.

| Control               |       | IFG                   |       | New-onset T2D         |       |
|-----------------------|-------|-----------------------|-------|-----------------------|-------|
| Mature ID             | Ct    | Mature ID             | Ct    | Mature ID             | Ct    |
| <i>hsa-miR-328-3p</i> | 22.58 | <i>hsa-miR-451a</i>   | 22.04 | <i>hsa-miR-451a</i>   | 21.68 |
| <i>hsa-miR-486-5p</i> | 24.46 | <i>hsa-miR-486-5p</i> | 23.46 | <i>hsa-miR-486-5p</i> | 22.36 |
| <i>hsa-miR-92a-3p</i> | 24.93 | <i>hsa-miR-223-3p</i> | 23.47 | <i>hsa-miR-92a-3p</i> | 23.20 |
|                       |       | <i>hsa-miR-92a-3p</i> | 24.27 | <i>hsa-miR-223-3p</i> | 23.35 |
|                       |       |                       |       | <i>hsa-miR-373-5p</i> | 24.11 |
|                       |       |                       |       | <i>hsa-miR-1280</i>   | 24.32 |
|                       |       |                       |       | <i>hsa-miR-4454</i>   | 24.59 |
